# Supplementary material
Source: PubMed Central journal article supplement (PMC1595454)

A.

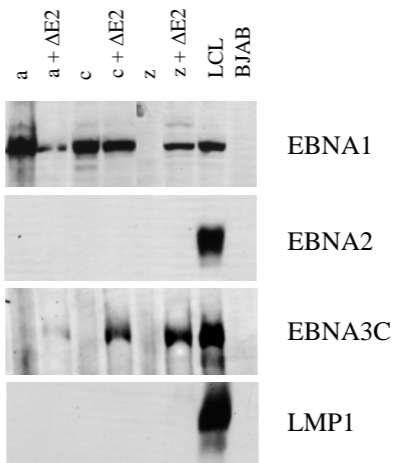

B.

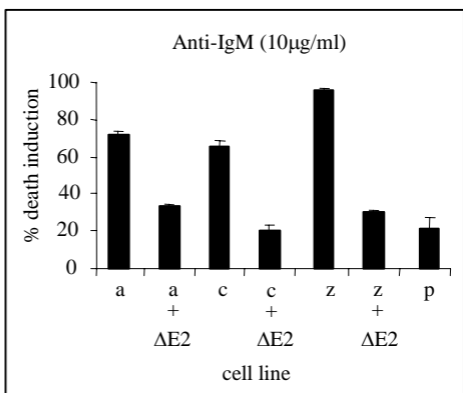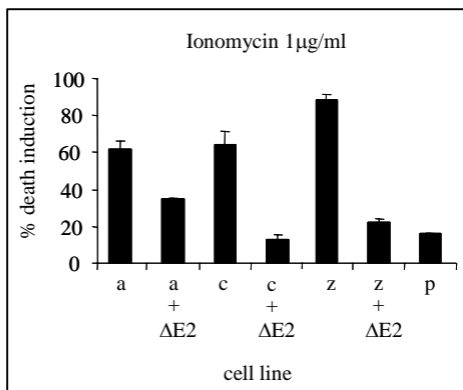

Supplement: pnas_0509988103_1.pdf [file pnas_0509988103_1.pdf]
